# Supplementary material for: Functional metagenomic exploration identifies novel prokaryotic copper resistance genes from the soil microbiome
Source: Royal Society of Chemistry journal article supplement (doi:10.1039/c9mt00273a), 2020-01-08
Supplement: c9mt00273a1.pdf [file c9mt00273a1.pdf]

**Table S1** Selective chemical properties of the soil samples used in this study

| Sample | Mn    | As  | Cu  | Zn  | Mo    | Cr | Cd   | Fe   | EC    | pH   |
|--------|-------|-----|-----|-----|-------|----|------|------|-------|------|
|        | mg/kg |     |     |     |       |    |      | g/kg | µs/cm |      |
| YKS    | 173   | 916 | 21  | 317 | 938.9 | 36 | 0.40 | 71   | 398   | 4.78 |
| LCS    | 513   | 18  | 19  | 71  | 3.1   | 74 | 0.19 | 25   | 387   | 7.46 |
| AXS    | 752   | 115 | 124 | 159 | 2.4   | 85 | 2.73 | 36   | 273   | 8.13 |
| HXS    | 285   | 7   | 10  | 32  | 0.3   | 28 | 0.08 | 14   | 2420  | 7.75 |

**Table S2** Descriptions of the open reading frames (ORFs) identified from the Cu resistance clones

| ID Clones (Length (bp)/ % GC) | ORF No. | ORF Length (aa) | BlastP Best Match                                                                                                                            |               |                                                                                                                       |            |
|-------------------------------|---------|-----------------|----------------------------------------------------------------------------------------------------------------------------------------------|---------------|-----------------------------------------------------------------------------------------------------------------------|------------|
|                               |         |                 | Most Similar Protein (organism)                                                                                                              | Accession No. | Predicted Function                                                                                                    | % Identity |
| CR1 (1450 / 65)               | 1       | 271             | Uncharacterized protein                                                                                                                      | ABA53426.1    | Glycerone kinase activity and glycerol metabolic process                                                              | 35         |
|                               | 2       | 143             | Aminoacyl-tRNA hydrolase<br>( <i>Acidobacteria bacterium</i> 13_1_40CM_4_65_8)                                                               | OLC81619.1    | Hydrolase activity and translation release factor activity                                                            | 68.2       |
| CR8 (1084 / 61)               | 1       | 141             | Uncharacterized protein<br>( <i>Acidobacteria bacterium</i> )                                                                                | PYT37751.1    | Uncharacterized                                                                                                       | 55.3       |
|                               | 2       | 49              | Uncharacterized protein<br>( <i>Streptomyces viridosporus</i> strain ATCC 14672 / DSM 40746 / JCM 4963 / KCTC 9882 / NRRL B-12104 / FH 1290) | EFE70172.1    | Nucleotidyltransferase, RNA-directed DNA polymerase                                                                   | 100        |
|                               | 3       | 37              | Uncharacterized protein<br>( <i>Lactobacillus crispatus</i> )                                                                                | KWU02988.1    | Uncharacterized                                                                                                       | 100        |
| CR9 (1786 / 63)               | 1       | 270             | Uncharacterized protein                                                                                                                      | ABA53426.1    | Glycerone kinase activity and glycerol metabolic process                                                              | 35         |
|                               | 2       | 138             | Aminoacyl-tRNA hydrolase<br>( <i>Acidobacteria bacterium</i> 13_1_40CM_4_65_8)                                                               | OLC81619.1    | Hydrolase activity and translation release factor activity                                                            | 68.2       |
|                               | 3       | 26              | Catalase<br>( <i>Bacteroides uniformis</i> CL03T12C37)                                                                                       | EIY72513.1    | Integral component of membrane and resistance to heavy metal stress and removal of excess ROS from heavy metal stress | 100        |
|                               | 4       | 49              | Uncharacterized protein<br>( <i>Streptomyces viridosporus</i> strain ATCC 14672 / DSM 40746 / JCM 4963 / KCTC 9882 / NRRL B-12104 / FH 1290) | EFE70172.1    | Uncharacterized                                                                                                       | 100        |
| CR11 (1681 / 67)              | 1       | > 401           | Uncharacterized protein<br>( <i>Acidobacteria bacterium</i> )                                                                                | PYR72484.1    | Endonuclease activity ,encoding different polyketone compounds and non-ribosomal peptides                             | 47.8       |

|                  |   |       |                                                                                                |            |                                                                                                                 |      |
|------------------|---|-------|------------------------------------------------------------------------------------------------|------------|-----------------------------------------------------------------------------------------------------------------|------|
|                  | 2 | 68    | Serine phosphatase RsbU,<br>regulator of sigma subunit<br>( <i>Streptomyces</i> sp. DvaIAA-14) | SCD93260.1 | Adjust serine phosphatase RsbU to activate a bacterial<br>transcription factor and adjust endonuclease activity | 50.9 |
| CR18 (1440 / 51) | 1 | > 336 | Pyruvate oxidase<br>( <i>Acidobacteria bacterium</i> )                                         | PYQ39079.1 | Catalytic activity, magnesium ion binding and thiamine<br>pyrophosphate binding                                 | 75.5 |
| CR19 (1357 / 63) | 1 | 113   | Uncharacterized protein<br>( <i>Acidobacteria bacterium</i> )                                  | RPH59784.1 | Transmembrane transporter activity                                                                              | 65.5 |
|                  | 2 | 286   | Uncharacterized protein<br>( <i>Halomonas heilongjiangensis</i> )                              | PMR71650.1 | Integral component of membrane , L-lactate dehydrogenase<br>activity                                            | 47.4 |
| CR21 (1434 / 58) | 1 | 272   | Uncharacterized protein<br>( <i>Acidobacteria bacterium</i> )                                  | PYV94921.1 | Dipeptidyl-peptidase 5 and biopolymer transporter TolR                                                          | 75.5 |
|                  | 2 | 56    | Uncharacterized protein<br>( <i>Candidatus Sulfopaludibacter</i> sp. SbA6)                     | SPE32068.1 | Uncharacterized                                                                                                 | 64.9 |
|                  | 3 | 93    | [Fe-S]-binding protein<br>( <i>Bryobacteriales bacterium</i> )                                 | HAX44309.1 | Iron-sulfur cluster binding activity                                                                            | 68.1 |
| CR23 (1295 / 60) | 1 | 57    | Uncharacterized protein<br>( <i>uncultured alpha proteobacterium</i> EB080_L06A09)             | ADI20086.1 | Uncharacterized                                                                                                 | 100  |
|                  | 2 | 280   | MFS transporter<br>( <i>Bradyrhizobium</i> sp. 2 39S1MB)                                       | AWM04175.1 | Transmembrane transport protein activity and integral<br>component of membrane                                  | 92.5 |
|                  | 3 | >59   | Uncharacterized protein<br>( <i>Uncultured Flavobacteriia bacterium</i> )                      | CBL87351.1 | Putative reverse transcriptase activity                                                                         | 100  |
| CR33 (1549 / 63) | 1 | 192   | Uncharacterized protein<br>(marine metagenome)                                                 | SUZ98599.1 | N-acetyltransferase activity and transmembrane transporter<br>activity                                          | 44.1 |
|                  | 2 | 212   | Class I SAM-dependent methyltransferase ( <i>Acidobacteria<br/>bacterium</i> )                 | RPI53964.1 | Methyltransferase activity                                                                                      | 66.3 |
| CR38 (1541 / 58) | 1 | 262   | 3-ketoacyl-ACP reductase                                                                       | KRB39811.1 | Reductase activity and reduction of 3-ketoacyl ACP to 3-                                                        | 75   |

|                  |   |       |                                                       |                                     |                                                               |      |
|------------------|---|-------|-------------------------------------------------------|-------------------------------------|---------------------------------------------------------------|------|
|                  |   |       |                                                       | ( <i>Rhodanobacter</i> sp. Root179) | hydroxyacyl ACP with NADPH as coenzyme                        |      |
| CR41 (1528 / 67) | 1 | > 488 | Uncharacterized protein                               | PZN28297.1                          | The twin-arginine translocation (Tat) pathway serves the role | 71.8 |
|                  |   |       |                                                       | ( <i>Proteobacteria</i> bacterium)  | of transporting folded proteins across energy-transducing     |      |
|                  |   |       |                                                       |                                     | membranes                                                     |      |
| CR47 (1789 / 64) | 1 | > 576 | HD domain-containing protein (Acidobacteria bacterium | OFW46919.1                          | DNA-binding protein activity                                  | 68.2 |
|                  |   |       |                                                       | RIFCSPLOWO2_12_FULL_67_14b)         |                                                               |      |

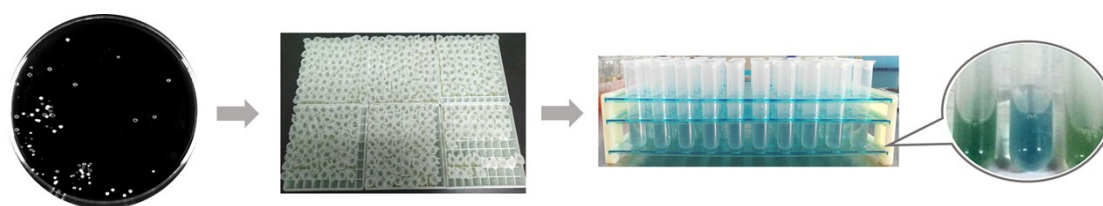

**Fig. S1.** Screening of positive clones in liquid medium. Common *E. coli* DH5 $\alpha$  containing recombinant DNA fragments were incubated in liquid LB medium with 100  $\mu\text{g}/\text{mL}$  ampicillin and 4.2 mmol/L Cu. After 6 hrs, the growth rate was measured using a biophotometer (Eppendorf, Germany).

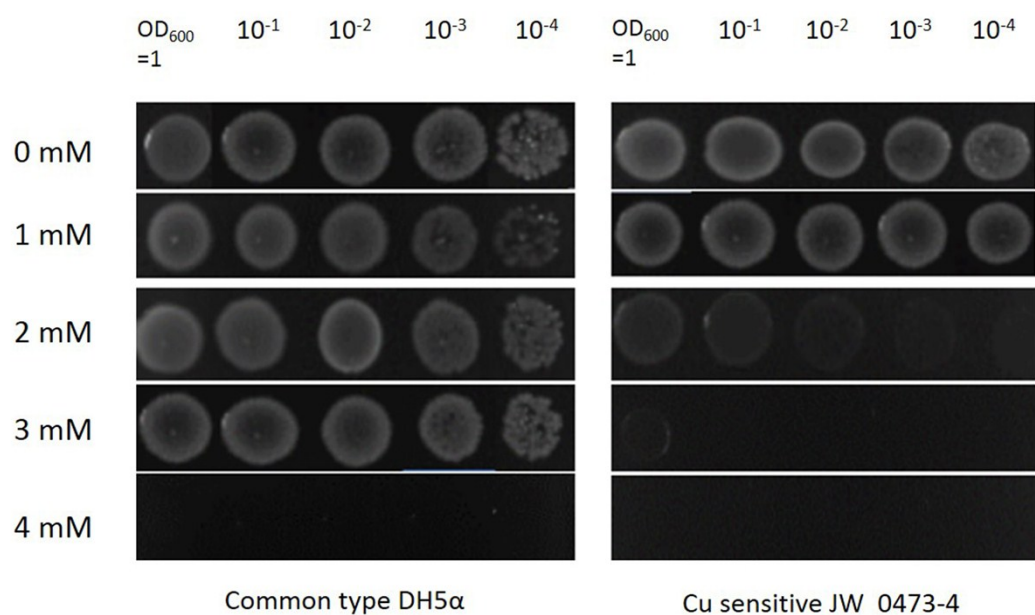

**Fig. S2.** Drop assay of the Cu-sensitive strain *E. coli* JW 0473-4 ( $\Delta CopA$ ) and common *E. coli* DH5 $\alpha$ . The *E. coli* cells were subject to a drop assay on LB plates with 0 to 4 mmol/L Cu, and 50  $\mu$ g/mL kanamycin was added to the plates. They were serially diluted (1–10<sup>-4</sup>) and incubated at 37 °C for 48h, after which growth curve were measured. This experiment was performed three times.

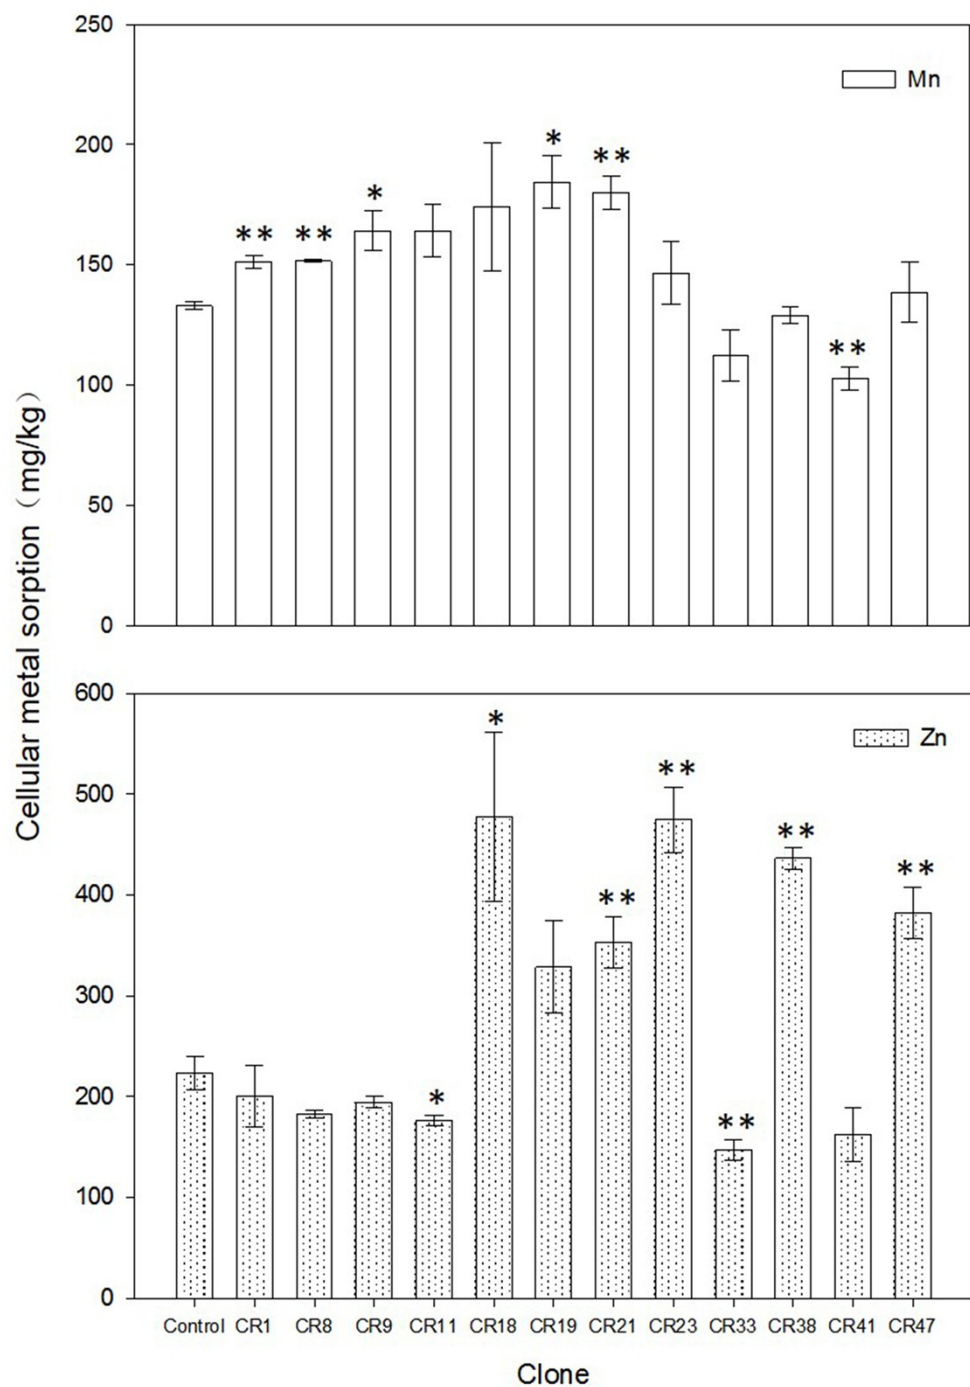

**Fig. S3.** Manganese and zinc sorption of the 12 clones in Cu-containing culture medium. Common type *E. coli* DH5 $\alpha$  containing recombinant DNA fragments were incubated using liquid LB medium with 100 $\mu$ g/mL ampicillin and 1 mmol/L Cu for 6h, followed by the measurement of Mn and Zn content of each strain using an inductively coupled plasma mass spectrometer (ICP-MS)(Thermo Fisher Scientific, USA). Vertical bars indicate standard deviations of the means (n = 3). The asterisk (\*) indicates significant difference between the cells harboring DNA fragments and the control harboring empty pUC118 with  $p < 0.05$  by t-test.

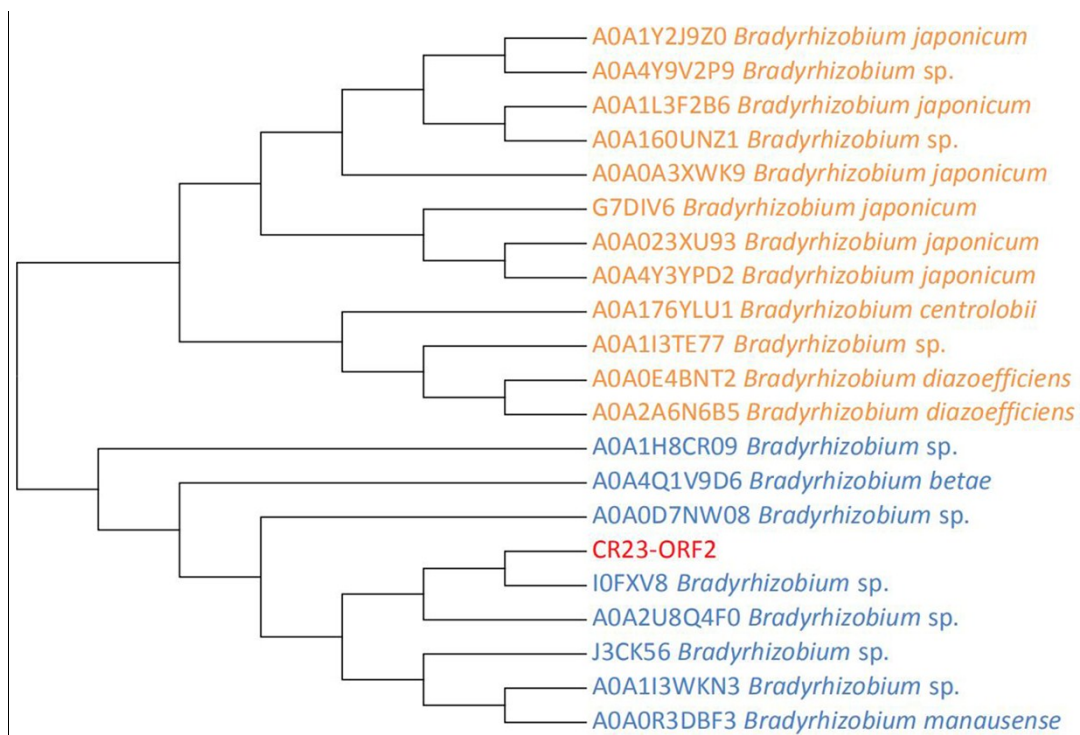

**Fig. S4.** A neighbor-joining phylogenetic tree to show the evolutionary relationships of CR23-orf2 and the other homologous proteins.
